# Supplementary material for: Dengue in the Middle East and North Africa: A Systematic Review
Source: PubMed Central journal article supplement (PMC5142774; doi:10.1371/journal.pntd.0005194), 2016-12-07
Supplement: pntd.0005194.s003.pdf [file pntd.0005194.s003.pdf]

**S1 Table. Precision and risk of bias assessment for dengue prevalence measures in the Middle East and North Africa.**

| Country, Ref.      | Year(s) of study | Population                       | Sample size | Prevalence | Risk of Bias Assessment |             |               | Precision |
|--------------------|------------------|----------------------------------|-------------|------------|-------------------------|-------------|---------------|-----------|
|                    |                  |                                  |             |            | Assay                   | Sampling*   | Response rate |           |
| <b>Afghanistan</b> |                  |                                  |             |            |                         |             |               |           |
| Elyan [1]          | 2008-10          | AFI patients                     | 913         | 19.2%      | High ROB                | n/a         | Unclear ROB   | High      |
| <b>Djibouti</b>    |                  |                                  |             |            |                         |             |               |           |
| Salah [2]          | 1987             | healthy soldiers                 | 50          | 0%         | High ROB                | High ROB    | Unclear ROB   | Low       |
|                    |                  | general population               | 69          | 0%         | High ROB                | High ROB    | Unclear ROB   | Low       |
|                    |                  | AFI patients                     | 41          | 0%         | High ROB                | n/a         | Unclear ROB   | Low       |
| Rodier [3]         | 1991             | AFI patients                     | 91          | 7.7-25.0%  | Low ROB                 | n/a         | Unclear ROB   | Low       |
| Fauld [4]          | 2011             | animal workers                   | 10          | 10.0%      | High ROB                | High ROB    | Unclear ROB   | Low       |
| Andayi [5]         | 2010-11          | general population               | 911         | 21.8%      | High ROB                | Low ROB     | High ROB      | High      |
| <b>Egypt</b>       |                  |                                  |             |            |                         |             |               |           |
| Mohammed [6]       | 1966             | general population               | 29          | 3.0-7.0%   | High ROB                | High ROB    | Unclear ROB   | Low       |
|                    |                  | general population               | 55          | 4.0-5.0%   | High ROB                | High ROB    | Unclear ROB   | Low       |
| Mohammed [7]       | 1968             | AFI patients                     | 120         | 0%         | High ROB                | n/a         | Unclear ROB   | High      |
|                    |                  | clinic population                | 78          | 0%         | High ROB                | Unclear ROB | Unclear ROB   | Low       |
| Darwish [8]        | 1969             | university students              | 1133        | 0.3%       | High ROB                | High ROB    | Unclear ROB   | High      |
| <b>Iran</b>        |                  |                                  |             |            |                         |             |               |           |
| Saidi [9]          | 1970             | n/s                              | 394         | 6.0%       | High ROB                | Unclear ROB | Unclear ROB   | High      |
| Saidi [10]         | 1970-71          | children                         | 100         | 0%         | High ROB                | Low ROB     | Unclear ROB   | High      |
| Chinikar [11]      | 2000-12          | AFI patients                     | 300         | 1.0-3.3%   | High ROB                | n/a         | Unclear ROB   | High      |
| Aghale [12]        | 2014             | blood donors                     | 540         | 7.6%       | High ROB                | High ROB    | Unclear ROB   | High      |
| <b>Kuwait</b>      |                  |                                  |             |            |                         |             |               |           |
| Ibrahim [13]       | 1966-68          | blood donors, patients, children | 627         | 6.5-8.1%   | High ROB                | Low ROB     | Unclear ROB   | High      |
| Al-Nakib [14]      | 1979-82          | patients                         | 502         | 3.2-8.4%** | High ROB                | Low ROB     | Unclear ROB   | High      |
| Pacsa [15]         | 2002*            | general population               | 425         | 13.9%      | High ROB                | Unclear ROB | Unclear ROB   | High      |
|                    |                  | general population               | 47          | 0%         | High ROB                | Unclear ROB | Unclear ROB   | Low       |
|                    |                  | expatriates from South Asia      | 266         | 37%        | High ROB                | Unclear ROB | Unclear ROB   | High      |
|                    |                  | expatriates from Southeast Asia  | 31          | 56.6%      | High ROB                | Unclear ROB | Unclear ROB   | Low       |
|                    |                  | expatriates from Middle East     | 140         | 25%        | High ROB                | Unclear ROB | Unclear ROB   | High      |
|                    |                  | suspected dengue                 | 210         | 9.0%       | Low ROB                 | n/a         | Unclear ROB   | High      |
| <b>Lebanon</b>     |                  |                                  |             |            |                         |             |               |           |
| Garabedian [16]    | 1962-65          | general population               | 113         | 61.9%      | High ROB                | Low ROB     | Unclear ROB   | High      |
|                    |                  | general population               | 171         | 49.1%      | High ROB                | Low ROB     | Unclear ROB   | High      |
| Hatem [17]         | 1969             | n/s                              | 126         | 0%         | High ROB                | Unclear ROB | Unclear ROB   | High      |
|                    |                  | n/s                              | 126         | 4.0%       | High ROB                | Unclear ROB | Unclear ROB   | High      |
| <b>Libya</b>       |                  |                                  |             |            |                         |             |               |           |
| Darwish [18]       | 1973             | children, patients               | 148         | 0%         | High ROB                | Unclear ROB | Unclear ROB   | High      |
| <b>Pakistan</b>    |                  |                                  |             |            |                         |             |               |           |
| Darwish [19]       | 1983*            | patients                         | 43          | 9.3%       | High ROB                | Unclear ROB | Unclear ROB   | Low       |
| Akram [20]         | 1994             | AFI patients                     | 122         | 9.8-14.6%  | High ROB                | n/a         | Low ROB       | High      |
| Siddiqui [21]      | 1999-2001        | AFI patients                     | 341         | 15.8%      | High ROB                | n/a         | Low ROB       | High      |
| Tariq [22]         | 2003             | suspected dengue                 | 52          | 73%        | High ROB                | n/a         | Unclear ROB   | Low       |
| Jamil [23]         | 2005             | suspected dengue                 | 106         | 36.8%      | High ROB                | n/a         | Unclear ROB   | High      |
| Khan [24]          | 2006             | suspected dengue                 | 83          | 50.7-87.9% | Low ROB                 | n/a         | Low ROB       | Low       |
| Khan [25]          | 2006             | suspected dengue                 | 250         | 23.2-74%   | Low ROB                 | n/a         | Low ROB       | High      |

|                     |           |                                           |        |                   |             |             |             |      |
|---------------------|-----------|-------------------------------------------|--------|-------------------|-------------|-------------|-------------|------|
| Koo [26]            | 2006-11   | suspected dengue                          | 200    | <b>47%</b>        | Low ROB     | n/a         | Unclear ROB | High |
| Khan [27]           | 2006-07   | suspected dengue                          | 50     | <b>40%</b>        | High ROB    | n/a         | Low ROB     | Low  |
| Khan [28]           | 2006-07   | suspected dengue                          | 15,040 | <b>26.3%</b>      | High ROB    | n/a         | Low ROB     | High |
| Abbasi [29]         | 2007-08   | suspected dengue                          | 114    | <b>69.6%</b>      | High ROB    | n/a         | Low ROB     | High |
| Tahir [30]          | 2008      | suspected dengue                          | 3215   | <b>54.9%</b>      | High ROB    | n/a         | Low ROB     | High |
| Murad [31]          | 2008      | suspected dengue                          | 70     | <b>17.1%</b>      | High ROB    | n/a         | Unclear ROB | Low  |
| Mahmood [32]        | 2008      | suspected dengue                          | 200    | <b>39.5%</b>      | High ROB    | n/a         | Low ROB     | High |
|                     |           | suspected dengue                          | 341    | <b>48.7%</b>      | High ROB    | n/a         | Low ROB     | High |
| Kidwai [33]         | 2008-09   | suspected dengue                          | 599    | <b>41.9-83.2%</b> | High ROB    | n/a         | Low ROB     | High |
| Zafar [34]          | 2009      | general population                        | 96     | <b>19.8%</b>      | High ROB    | Low ROB     | Unclear ROB | Low  |
| Zafar [35]          | 2009      | general population                        | 244    | <b>28.8%</b>      | High ROB    | Unclear ROB | Unclear ROB | High |
| Qureshi [36]        | 2010-12   | suspected dengue                          | 162    | <b>9.9%</b>       | High ROB    | n/a         | Low ROB     | High |
| Khan [37]           | 2010      | suspected dengue                          | 125    | <b>54.4%</b>      | High ROB    | n/a         | Low ROB     | High |
| Hasan [38]          | 2010      | suspected dengue                          | 259    | <b>34.8%</b>      | High ROB    | n/a         | Unclear ROB | High |
| Umar [39]           | 2010      | suspected dengue                          | 500    | <b>6.8%</b>       | High ROB    | n/a         | Low ROB     | High |
| Jameel [40]         | 2010      | suspected dengue                          | 341    | <b>48.7%</b>      | High ROB    | n/a         | Low ROB     | High |
| Naeem [41]          | 2011      | suspected dengue                          | 79     | <b>25.3%</b>      | High ROB    | n/a         | Unclear ROB | Low  |
| Ahmed [42]          | 2011      | suspected dengue                          | 640    | <b>43.9%</b>      | High ROB    | n/a         | Unclear ROB | High |
| Ijaz [43]           | 2011      | suspected dengue                          | 5,274  | <b>49%</b>        | High ROB    | n/a         | Unclear ROB | High |
| Rashid [44]         | 2011      | suspected dengue                          | 254    | <b>36.6%</b>      | High ROB    | n/a         | Low ROB     | High |
| Khan [45]           | 2011      | suspected dengue                          | 50     | <b>60-72%</b>     | Low ROB     | n/a         | Low ROB     | Low  |
| Hasan [46]          | 2007-13   | suspected Crimean-Congo Hemorrhagic Fever | 168    | <b>33.9%</b>      | Low ROB     | n/a         | Low ROB     | High |
| Ali [47]            | 2011      | suspected dengue                          | 612    | <b>20.2%</b>      | High ROB    | n/a         | Unclear ROB | High |
| Hisam [48]          | 2012      | AFI patients                              | 500    | <b>3.2%</b>       | High ROB    | n/a         | Low ROB     | High |
| Assir[49]           | 2012      | suspected dengue                          | 85     | <b>43.5%</b>      | Low ROB     | n/a         | Unclear ROB | Low  |
| <b>Saudi Arabia</b> |           |                                           |        |                   |             |             |             |      |
| Fakeeh [50]         | 1994-99   | suspected dengue                          | 985    | <b>16.2-31.9%</b> | Low ROB     | n/a         | Low ROB     | High |
| Fakeeh [51]         | 1994-2002 | suspected dengue                          | 1020   | <b>10.8-50.5%</b> | Low ROB     | n/a         | Low ROB     | High |
| Khan [52]           | 2004      | suspected dengue                          | 136    | <b>32.4-58.8%</b> | Low ROB     | n/a         | Unclear ROB | High |
| Ayyub [53]          | 2004-05   | suspected dengue                          | 80     | <b>48.8%</b>      | High ROB    | n/a         | Unclear ROB | Low  |
| Shahin [54]         | 2006-08   | suspected dengue                          | 159    | <b>100%</b>       | Low ROB     | n/a         | Low ROB     | High |
| Said [55]           | 2006      | suspected dengue                          | 525    | <b>19.2%</b>      | High ROB    | n/a         | Low ROB     | High |
| Memish [56]         | 2010      | adult military                            | 1024   | <b>0.1%</b>       | High ROB    | Unclear ROB | Unclear ROB | High |
| Gamil [57]          | 2010-11   | suspected dengue                          | 553    | <b>47.7%</b>      | Unclear ROB | n/a         | Unclear ROB | High |
| Al-Azraqi [58]      | 2013      | patients                                  | 268    | <b>26.5%</b>      | High ROB    | Low ROB     | Unclear ROB | High |
|                     |           | patients                                  | 697    | <b>33.7%</b>      | High ROB    | Low ROB     | Unclear ROB | High |
| Ashshi [59]         | 2014      | blood donors                              | 100    | <b>1-7%</b>       | High ROB    | High ROB    | Low ROB     | High |
| <b>Somalia</b>      |           |                                           |        |                   |             |             |             |      |
| Botros [60]         | 1987      | AFI patients                              | 38     | <b>14.2-60.7%</b> | Low ROB     | n/a         | Unclear ROB | Low  |
| Kanesa-thasan [61]  | 1993      | AFI patients                              | 84     | <b>17.8%</b>      | Low ROB     | n/a         | Unclear ROB | Low  |
| Sharp [62]          | 1992-93   | AFI military soldiers                     | 129    | <b>34.9%</b>      | Low ROB     | n/a         | Unclear ROB |      |
|                     |           | adult military                            | 494    | <b>7.7%</b>       | High ROB    | High ROB    | Low ROB     | High |
| Nur [63]            | 1995      | children                                  | 23     | <b>0%</b>         | High ROB    | High ROB    | Unclear ROB | Low  |
|                     |           | AFI patients                              | 46     | <b>0%</b>         | High ROB    | n/a         | Unclear ROB | Low  |
| Kyobe Bosa [64]     | 2011      | AFI patients                              | 134    | <b>62-80%</b>     | Low ROB     | n/a         | Low ROB     | High |
| <b>Sudan</b>        |           |                                           |        |                   |             |             |             |      |
| Omer [65]           | 1976      | general population                        | 109    | <b>17.4-27.5%</b> | Low ROB     | High ROB    | Unclear ROB | High |

|                 |         |                                     |        |            |          |          |             |      |
|-----------------|---------|-------------------------------------|--------|------------|----------|----------|-------------|------|
| Hyams [66]      | 1984    | AFI patients                        | 100    | 21%        | Low ROB  | n/a      | Unclear ROB | High |
| Woodruff [67]   | 1986    | AFI patients                        | 130    | 40.0%      | High ROB | n/a      | Unclear ROB | High |
| McCarthy [68]   | 1988    | patients                            | 100    | 49%        | High ROB | High ROB | Unclear ROB | High |
|                 |         | AFI patients                        | 196    | 48%        | High ROB | n/a      | Low ROB     | High |
| Watts [69]      | 1989    | AFI patients                        | 185    | 24.0%      | High ROB | n/a      | Unclear ROB | High |
| Ibrahim [70]    | 1997-99 | suspected measles                   | 188    | 3.2%       | High ROB | n/a      | Low ROB     | High |
| Malik [71]      | 2004-05 | Hospitals; suspected dengue         | 40     | 90.0%      | Low ROB  | n/a      | Low ROB     | Low  |
| Gould [72]      | 2005    | AFI patients                        | 34     | 5.9%**     | High ROB | n/a      | Low         | Low  |
| Farnon [73]     | 2005    | general population                  | 87     | 1.1%       | Low ROB  | Low ROB  | Unclear ROB | Low  |
| Seidahmed [74]  | 2008-09 | general population                  | 791    | 5.2%       | High ROB | Low ROB  | Low ROB     | High |
| Adam [75]       | 2008-09 | pregnant women                      | 10,820 | 0.7%       | High ROB | High ROB | Low ROB     | High |
| Himatt [76]     | 2011    | general population                  | 489    | 0.6-9.4%   | High ROB | Low ROB  | Low ROB     | High |
| Abdalla [77]    | 2012    | AFI patients                        | 60     | 11.7%      | High ROB | n/a      | Low ROB     | Low  |
| Elduma [78]     | 2012    | pregnant women with AFI             | 39     | 12.8%      | Low ROB  | n/a      | Low ROB     | Low  |
| Soghaier [79]   | 2014    | general population                  | 600    | 27.7%      | High ROB | Low ROB  | Low ROB     | High |
| <b>Turkey</b>   |         |                                     |        |            |          |          |             |      |
| Ari [80]        | 1971    | general population                  | 270    | 0%         | High ROB | High ROB | Unclear ROB | High |
| Radda [81]      | 1973*   | general population                  | 270    | 0.3%       | High ROB | High ROB | Unclear ROB | High |
|                 |         | general population                  | 90     | 0%         | High ROB | High ROB | Unclear ROB | Low  |
|                 |         | general population                  | 95     | 0%         | High ROB | High ROB | Unclear ROB | Low  |
| Ergunay [82]    | 2010    | blood donors                        | 2435   | 0.9%       | High ROB | Low ROB  | Unclear ROB | High |
| Tezcan [83]     | 2010-11 | blood donors                        | 920    | 0.9-16.6%  | High ROB | Low ROB  | Unclear ROB | High |
| <b>Yemen</b>    |         |                                     |        |            |          |          |             |      |
| Bin Ghouth [84] | 2011    | suspected dengue                    | 982    | 50.6-64.1% | Low ROB  | n/a      | Low ROB     | High |
| Malik [85]      | 2010-11 | AFI patients                        | 136    | 8.1-87.5%  | High ROB | n/a      | Low ROB     | High |
| Madani [86]     | 2010    | suspected viral hemorrhagic fever   | 207    | 0.9-78.7%  | Low ROB  | n/a      | Low ROB     | High |
| Rezza [87]      | 2012    | suspected dengue                    | 400    | 13.8%      | Low ROB  | n/a      | Unclear ROB | High |
| Qassem [88]     | 2013    | suspected dengue or West Nile fever | 42     | 19.0%      | High ROB | n/a      | Unclear ROB | Low  |

\* Since the populations of acute febrile illness and suspected dengue infection are defined as populations presenting to a health facility with acute infection, no population-based sampling is needed to capture these populations and they are denoted 'n/a' in the sampling column.

Abbreviation: AFI, acute febrile illness

## References

1. Elyan DS, Moustafa L, Noormal B, Jacobs JS, Aziz MA, Hassan KS, et al. Serological evidence of Flaviviruses infection among acute febrile illness patients in Afghanistan. *J Infect Dev Ctries*. 2014;8(9):1176-80. doi: 10.3855/jidc.4183. PMID: 25212082.
2. Salah S, Fox E, Abbatte EA, Constantine NT, Asselin P, Soliman AK. A negative human serosurvey of haemorrhagic fever viruses in Djibouti. *Annales de l'Institut Pasteur Virology*. 1988;139(4):439-42. PMID: 1989024043.
3. Rodier GR, Gubler DJ, Cope SE, Cropp CB, Soliman AK, Polycarpe D, et al. Epidemic dengue 2 in the city of Djibouti 1991-1992. *Transactions of the Royal Society of Tropical Medicine and Hygiene*. 1996;90(3):237-40. doi: <http://dx.doi.org/10.1016/S0035-9203%2896%2990228-X>. PMID: 1996194667.
4. Faulde MK, Spiesberger M, Abbas B. Sentinel site-enhanced near-real time surveillance documenting West Nile virus circulation in two Culex mosquito species indicating different transmission characteristics, Djibouti City, Djibouti. *Journal of the Egyptian Society of Parasitology*. 2012;42(2):461-74. PMID: 23214223.
5. Andayi F, Charrel RN, Kieffer A, Richet H, Pastorino B, Leparc-Goffart I, et al. A sero-epidemiological study of arboviral fevers in Djibouti, horn of Africa. *PLoS Negl Trop Dis*. 2014;8(12):e3299. doi: 10.1371/journal.pntd.0003299. PMID: 25502692.

6. Mohammed YS, Sekeyova M, Gresikova M, el-Dawala K. Studies on arboviruses in Egypt. I. Hemagglutination-inhibition antibodies against arboviruses in human population of Alexandria and Abyss areas. *The Indian journal of medical research*. 1968;56(4):381-5. PMID: 5687693.
7. Mohammed YS, Gresikova M, Adamyova K, Ragib AHe-DK. Studies on arboviruses in Egypt. II. Contribution of arboviruses to the aetiology of undiagnosed fever among children. *The Journal of hygiene*. 1970;68(3):491-5. PMID: 5272347.
8. Darwish MA, Ibrahim AH. Prevalence of antibodies to arboviruses in Egypt. Results of a serologic survey among 1,113 university students. *American Journal of Tropical Medicine and Hygiene*. 1975;24(6 I):981-5. PMID: 0976189164.
9. Saidi S. Survey of antibodies to arboviruses in human population of Iran. *Pahlavi Medical Journal*. 1971;2(3):485-90. PMID: 0008837992.
10. Saidi S. Viral antibodies in preschool children from the Caspian area, Iran. *Iranian Journal of Public Health*. 1974;3(2):83-91. PMID: 0975149818.
11. Chinikar S, Ghiasi SM, Shah-Hosseini N, Mostafavi E, Moradi M, Khakifirouz S, et al. Preliminary study of dengue virus infection in Iran. *Travel Medicine and Infectious Disease*. 2013;11(3):166-9. doi: <http://dx.doi.org/10.1016/j.tmaid.2012.10.001>. PMID: 2013353214.
12. Aghaie A, Aaskov J, Chinikar S, Niedrig M, Banazadeh S, Mohammadpour HK. Frequency of dengue virus infection in blood donors in Sistan and Baluchestan province in Iran. *Transfusion and Apheresis Science*. 2014;50(1):59-62. doi: <http://dx.doi.org/10.1016/j.transci.2013.07.034>. PMID: 2014206312.
13. Ibrahim SH, Darwish MA, Wahdan MH, El Ghoroury AAA. Survey for antibodies against group B arboviruses in man in Kuwait. *Journal of the Egyptian Public Health Association*. 1974;49(2):77-95. PMID: 0975155283.
14. Al-Nakib W, Lloyd G, El-Mekki A, Platt G, Beeson A, Southee T. Preliminary report on arbovirus-antibody prevalence among patients in Kuwait: evidence of Congo/Crimean virus infection. *Transactions of the Royal Society of Tropical Medicine and Hygiene*. 1984;78(4):474-6. PMID: 6435292.
15. Pacsa A, Mustafa AS, Chaturvedi UC. Study of dengue virus infection in Kuwait. *Dengue Bulletin*. 2002;26(pp 113-117). PMID: 2003387961.
16. Garabedian GA, Matossian RM, Musalli MN. Serologic evidence of arbovirus infection in Lebanon. *Le Journal medical libanais*. 1971;The Lebanese medical journal. 24(4):339-50. PMID: 5149804.
17. Hatem J. The role of the laboratory in the surveillance of viral diseases in Lebanon. *Journal Medical Libanais*. 1972;25(3):151-65. PMID: 0007410031.
18. Darwish MA, Ibrahim AH. A serological survey on group A and B arbovirus antibodies in Libya. *Journal of the Egyptian Public Health Association*. 1974;49(1):20-6. PMID: 0975093643.
19. Darwish MA, Hoogstraal H, Roberts TJ, Ahmed IP, Omar F. A sero-epidemiological survey for certain arboviruses (Togaviridae) in Pakistan. *Transactions of the Royal Society of Tropical Medicine and Hygiene*. 1983;77(4):442-5. PMID: 6314612.
20. Akram DS, Igarashi A, Takasu T. Dengue virus infection among children with undifferentiated fever in Karachi. *Indian journal of pediatrics*. 1998;65(5):735-40. PMID: 10773930.
21. Siddiqui FJ, Haider SR, Bhutta ZA. Endemic Dengue Fever: A seldom recognized hazard for Pakistani children. *Journal of Infection in Developing Countries*. 2009;3(4):306-12. PMID: 2009318550.
22. Tariq W KS, Hussain A, Bhani E. Outbreak of dengue fever in Mangla and Mirpur area. *Pak J Pathol*. 2006;17(3):122.
23. Jamil B, Hasan R, Zafar A, Bewley K, Chamberlain J, Mioulet V, et al. Dengue virus serotype 3, Karachi, Pakistan. *Emerg Infect Dis*. 2007;13(1):182-3.
24. Khan E, Mehraj V, Nasir A, Khan NA, Billoo B, Moatter T, et al. Evaluation of two ELISA Assay Kits against RT-PCR for diagnosis of Dengue Virus Infection in a Hospital Setting in Karachi, Pakistan. *Journal of the Pakistan Medical Association*. 2009;59(6):390-4. PMID: 2009286971.
25. Khan E, Hasan R, Mehraj V, Nasir A, Siddiqui J, Hewson R. Co-circulations of two genotypes of dengue virus in 2006 out-break of dengue hemorrhagic fever in Karachi, Pakistan. *Journal of Clinical Virology*. 2008;43(2):176-9. doi: <http://dx.doi.org/10.1016/j.jcv.2008.06.003>. PMID: 2008418044.
26. Koo C, Nasir A, Hapuarachchi HC, Lee KS, Hasan Z, Ng LC, et al. Evolution and heterogeneity of multiple serotypes of Dengue virus in Pakistan, 2006-2011. *Virology Journal*. 2013. doi: <http://dx.doi.org/10.1186/1743-422X-10-275>. PMID: 2013586909.
27. Khan AH, Hayat AS, Masood N, Solangi NM, Shaikh TZ. Frequency and clinical presentation of dengue fever at tertiary care hospital of Hyderabad/Jamshoro. *Journal of the Liaquat University of Medical and Health Sciences*. 2010;9(2):88-94. PMID: 2010602294.
28. Khan E, Kisat M, Khan N, Nasir A, Ayub S, Hasan R. Demographic and clinical features of dengue fever in Pakistan from 2003-2007: A retrospective cross-sectional study. *PLoS ONE*. 2010;5(9):1-7. doi: <http://dx.doi.org/10.1371/journal.pone.0012505>. PMID: 2010592334.
29. Abbasi A, Butt N, Sheikh QH, Bhutto AR, Munir SM, Ahmed SM. Clinical features, diagnostic techniques and management of dual dengue and Malaria infection. *Journal of the College of Physicians and Surgeons Pakistan*. 2009;19(1):25-9. PMID: 2009145621.
30. Tahir Z HS, Chaudhry A. Spatial and seasonal variation of dengue fever in Lahore 2008. *Biomedica*. 2010;26(Jul-Dec.):166.

31. Murad H, Asahar RJ, Zaheen M, Shawali R. Outbreak investigation of Dengue fever in Sundia, Chakaiser, Shangla, Pakistan-2008. *Journal of Ayub Medical College, Abbottabad* : JAMC. 2014;26(4):571-6. PMID: 25672190.
32. Mahmood K AH, Tahir M. Incidence of dengue haemorrhagic fever in local population of Lahore, Pakistan. *Biomedica*. 2009;25(Jul.-Dec.):93-6.
33. Kidwai AA, Jamal Q, Saher, Mehrunnisa, Farooqi FU, Saleem U. Serodiagnosis of dengue infection using rapid immunochromatography test in patients with probable dengue infection. *J Pak Med Assoc*. 2010;60(11):936-9.
34. Zafar H, Hayyat A, Akhtar N, Rizwan SF. Prevalence of undifferentiated fever in adults of Rawalpindi having primary dengue fever. *JPMA The Journal of the Pakistan Medical Association*. 2013;63(6):770-1. PMID: 23901683.
35. Zafar H, Hayyat A, Akhtar N. Incidence of primary dengue viral infection in healthy adults of Rawalpindi, Pakistan. *Journal of the Pakistan Medical Association*. 2011;61(10):1030-31. PMID: 2011534565.
36. Qureshi KA LA, Samoo AH. Screening for dengue virus infection at GMMMC hospital, Sukkur. *Medical Forum Monthly*. 2013;24(4):6-8.
37. Khan H KQ, Khan BA, Arif M, Raza AAH. Retrospective analysis of 68 cases of dengue fever. *Pak J Med Res*. 2012;51(1):18.
38. Hasan SR, Riaz M, Jafri FA. Characteristics and outcome of dengue infection; clinical perspective from a secondary care hospital of Karachi. *Pakistan Journal of Medical Sciences*. 2013;29(1):115-8. doi: <http://dx.doi.org/http://dx.doi.org/10.12669/pjms.291.2742>. PMID: 2013068279.
39. Umar S, Ashraf O, Umar M. Characteristics of febrile thrombocytopenia during dengue epidemic 2010 in Rawalpindi, Pakistan. *International Journal of Infectious Diseases*. 2011;(15):S114-S115. doi: <http://dx.doi.org/10.1016/S1201-9712%2811%2960399-8>. PMID: 70496826.
40. Jameel T MK, Ghulam Choudhry N, Afzal NP, Paul RF. Changing hematologic parameters in dengue viral infections. *J Ayub med Coll-Abbotabad-Pak*. 2012;24(1):3.
41. Naeem M SA, Batool S, Rubab S, Saba T, Riaz T, Mahmood A. Dengue fever; a clinical experience *Professional Med J*. 2014;23(2):243-46.
42. Ahmed S, Mohammad WW, Hamid F, Akhter A, Afzal RK, Mahmood A. The 2011 dengue haemorrhagic fever outbreak in lahore - an account of clinical parameters and pattern of haemorrhagic complications. *Journal of the College of Physicians and Surgeons Pakistan*. 2013;23(7):463-7. PMID: 2013472360.
43. Ijaz T, Ijaz S, Aslam S, Ahmad BM, Raja SA. A laboratory based study of dengue epidemic in the city of Lahore during year 2011. *International Journal of Infectious Diseases*. 2014;Conference:16th International Congress on Infectious Diseases. 2014;(21):136. doi: <http://dx.doi.org/10.1016/j.ijid.2014.03.708>. PMID: 71634046.
44. Rashid A KH, Nadeem UR. Dengue Hemorrhagic Fever / dengue shock syndrome. *Professional Med J*. 2012;19(5):661.
45. Khan MA, Ellis EM, Tissera HA, Alvi MY, Rahman FF, Masud F, et al. Emergence and Diversification of Dengue 2 Cosmopolitan Genotype in Pakistan, 2011. *PLoS ONE*. 2013;8(3). doi: <http://dx.doi.org/10.1371/journal.pone.0056391>. PMID: 2013153148.
46. Hasan Z, Atkinson B, Jamil B, Samreen A, Altaf L, Hewson R. Short report: Diagnostic testing for hemorrhagic fevers in Pakistan: 2007-2013. *American Journal of Tropical Medicine and Hygiene*. 1243;91(6):1243-6. doi: <http://dx.doi.org/10.4269/ajtmh.14-0383>. PMID: 2014984911.
47. Ali A, Rehman HU, Nisar M, Rafique S, Ali S, Hussain A, et al. Seroepidemiology of dengue fever in Khyber Pakhtunkhawa, Pakistan. *International Journal of Infectious Diseases*. 2013;17(7):e518-e23. doi: <http://dx.doi.org/10.1016/j.ijid.2013.01.007>. PMID: 2013302716.
48. Hisam A, Mahmood ur R, Khan MB, Kadir E, Azam N. Frequency of co-existence of dengue and malaria in patients presenting with acute febrile illness. *JPMA The Journal of the Pakistan Medical Association*. 2014;64(3):247-51. PMID: 24864593.
49. Assir MZK, Masood MA, Ahmad HI. Concurrent dengue and malaria infection in Lahore, Pakistan during the 2012 dengue outbreak. *International Journal of Infectious Diseases*. 2014;18(1):41-6. doi: <http://dx.doi.org/10.1016/j.ijid.2013.09.007>. PMID: 2014008756.
50. Fakeeh M, Zaki AM. Virologic and serologic surveillance for dengue fever in Jeddah, Saudi Arabia, 1994-1999. *American Journal of Tropical Medicine and Hygiene*. 2001;65(6):764-7. PMID: 2002021757.
51. Fakeeh M, Zaki AM. Dengue in Jeddah, Saudi Arabia, 1994-2002. *Dengue Bulletin*. 2003;(27):13-18. PMID: 2004280253.
52. Khan NA, Azhar EI, El-Fiky S, Madani HH, Abuljadial MA, Ashshi AM, et al. Clinical profile and outcome of hospitalized patients during first outbreak of dengue in Makkah, Saudi Arabia. *Acta Tropica*. 2008;105(1):39-44. doi: <http://dx.doi.org/10.1016/j.actatropica.2007.09.005>. PMID: 2007609584.
53. Ayyub M, Khazindar AM, Lubbad EH, Barlas S, Alfi AY, Al-Ukayli S. Characteristics of dengue fever in a large public hospital, Jeddah, Saudi Arabia. *Journal of Ayub Medical College, Abbottabad*. 2006;18(2):9-13. PMID: 16977805.
54. Shahin W, Nassar A, Kalkattawi M, Bokhari H. Dengue fever in a tertiary hospital in Makkah, Saudi Arabia. *Dengue Bulletin*. 2009;33(1):34-44. PMID: 2011641978.

55. Said SM EK, Alyan Z. Benign acute myositis in association with acute dengue viruses' infections. *Egypt J Neurol Psychiatry Neurosurg.* 2008;45(1):193.
56. Memish ZA, Albarrak A, Almazroa MA, Al-Omar I, Alhakeem R, Assiri A, et al. Seroprevalence of Alkhurma and other hemorrhagic fever viruses, Saudi Arabia. *Emerging Infectious Diseases.* 2011;17(12):2316-8. doi: <http://dx.doi.org/http://dx.doi.org/10.3201/eid1712.110658>. PMID: 2011666410.
57. Gamil MA, Eisa ZM, Eifan SA, Al-Sum BA. Prevalence of dengue fever in Jizan area, Saudi Arabia. *Journal of Pure and Applied Microbiology.* 2014;8(1):225-31. PMID: 2014242333.
58. Al-Azraqi TA, El Mekki AA, Mahfouz AA. Seroprevalence of dengue virus infection in Aseer and Jizan regions, Southwestern Saudi Arabia. *Transactions of the Royal Society of Tropical Medicine and Hygiene.* 2013;107(6):368-71. doi: <http://dx.doi.org/10.1093/trstmh/trt022>. PMID: 2013533560.
59. Ashshi AM. Serodetection of Dengue virus and its antibodies among blood donors in the western region of Saudi Arabia: a preliminary study. *Blood Transfus.* 2015;13(1):135-8. doi: 10.2450/2014.0134-14. PMID: 25369603.
60. Botros BAM, Watts DM, Soliman AK, Salib AW, Moussa MI, Mursal H, et al. Serological evidence of dengue fever among refugees, Hargeysa, Somalia. *Journal of Medical Virology.* 1989;29(2):79-81. PMID: 1989282288.
61. Kanesa-athan N, Iacono-Connors L, Magill A, Smoak B, Vaughn D, Dubois D, et al. Dengue serotypes 2 and 3 in US forces in Somalia. *Lancet.* 1994;343(8898):678.
62. Sharp TW, Wallace MR, Hayes CG, Sanchez JL, DeFraites RF, Arthur RR, et al. Dengue fever in U.S. troops during Operation Restore Hope, Somalia, 1992-1993. *Am J Trop Med Hyg.* 1995;53(1):89-94.
63. Nur YA, Groen J, Yusuf MA, Osterhaus ADME. IgM antibodies in hospitalized children with febrile illness during an inter-epidemic period of measles, in Somalia. *Journal of Clinical Virology.* 1999;12(1):21-5. doi: <http://dx.doi.org/10.1016/S1386-6532%2898%2900002-X>. PMID: 1999063004.
64. Kyobe Bosa H, Montgomery JM, Kimuli I, Lutwama JJ. Dengue fever outbreak in Mogadishu, Somalia 2011: Co-circulation of three dengue virus serotypes. *International Journal of Infectious Diseases.* 2014;(21):3. doi: <http://dx.doi.org/10.1016/j.ijid.2014.03.412>. PMID: 71633760.
65. Omer AHS, McLaren ML, Johnson BK. A seroepidemiological survey in the Gezira, Sudan, with special reference to arboviruses. *Journal of Tropical Medicine and Hygiene.* 1981;84(2):63-6. PMID: 1981213114.
66. Hyams KC, Oldfield EC, McNair Scott R. Evaluation of febrile patients in Port Sudan, Sudan: Isolation of dengue virus. *American Journal of Tropical Medicine and Hygiene.* 1986;35(4):860-5. PMID: 1986196316.
67. Woodruff PWR, Morrill JC, Burans JP, Hyams KC, Woody JN. A study of viral and rickettsial exposure and causes of fever in Juba, southern Sudan. *Transactions of the Royal Society of Tropical Medicine and Hygiene.* 1988;82(5):761-6. doi: <http://dx.doi.org/10.1016/0035-9203%2888%2990229-5>. PMID: 1988257341.
68. McCarthy MC, Haberberger RL, Salib AW, Soliman BA, El-Tigani A, Khalid IO, et al. Evaluation of arthropod-borne viruses and other infectious disease pathogens as the causes of febrile illnesses in the Khartoum province of Sudan. *Journal of Medical Virology.* 1996;48(2):141-6. doi: <http://dx.doi.org/10.1002/%28SIC1%291096-9071%28199602%2948:2%3C141::AID-JMV4%3E3.0.CO;2-9>. PMID: 1996056198.
69. Watts DM, El-Tigani A, Botros BAM, Salib AW, Olson JG, McCarthy M, et al. Arthropod-borne viral infections associated with a fever outbreak in the Northern Province of Sudan. *Journal of Tropical Medicine and Hygiene.* 1994;97(4):228-30. PMID: 1994258772.
70. Ibrahim SA, Mustafa OM, Mukhtar MM, Saleh EA, El Mubarak HS, Abdallah A, et al. Measles in suburban Khartoum: An epidemiological and clinical study. *Tropical Medicine and International Health.* 2002;7(5):442-9. doi: <http://dx.doi.org/10.1046/j.1365-3156.2002.00884.x>. PMID: 2002183345.
71. Malik A, Earhart K, Mohareb E, Saad M, Saeed M, Ageep A, et al. Dengue hemorrhagic fever outbreak in children in Port Sudan. *Journal of Infection and Public Health.* 2011;4(1):1-6. doi: <http://dx.doi.org/10.1016/j.jiph.2010.08.001>. PMID: 2011100176.
72. Gould LH, Osman MS, Farnon EC, Griffith KS, Godsey MS, Karch S, et al. An outbreak of yellow fever with concurrent chikungunya virus transmission in South Kordofan, Sudan, 2005. *Transactions of the Royal Society of Tropical Medicine and Hygiene.* 2008;102(12):1247-54. doi: <http://dx.doi.org/10.1016/j.trstmh.2008.04.014>. PMID: 2008503238.
73. Farnon EC, Gould LH, Griffith KS, Osman MS, El Kholy A, Brair ME, et al. Household-Based Sero-Epidemiologic Survey after a Yellow Fever Epidemic, Sudan, 2005. *American Journal of Tropical Medicine and Hygiene.* 2010;82(6):1146-52. doi: <http://dx.doi.org/10.4269/ajtmh.2010.09-0105>. PMID: 2010347047.
74. Seidahmed OME, Hassan SA, Soghaier MA, Siam HAM, Ahmed FTA, Elkarsany MM, et al. Spatial and Temporal Patterns of Dengue Transmission along a Red Sea Coastline: A Longitudinal Entomological and Serological Survey in Port Sudan City. *PLoS Neglected Tropical Diseases.* 2012;6(9). doi: <http://dx.doi.org/10.1371/journal.pntd.0001821>. PMID: 2012579248.

75. Adam I, Jumaa AM, Elbashir HM, Karsany MS. Maternal and perinatal outcomes of dengue in PortSudan, Eastern Sudan. *Virology Journal*. 2010;7(153). doi: <http://dx.doi.org/10.1186/1743-422X-7-153>. PMID: 2010416905.
76. Himatt S, Osman KE, Okoued SI, Seidahmed OE, Beatty ME, Soghaier MA, et al. Sero-prevalence of dengue infections in the Kassala state in the eastern part of the Sudan in 2011. *J Infect Public Health*. 2015. doi: 10.1016/j.jiph.2015.04.023. PMID: 25975993.
77. Abdalla TM, Karsany MS, Ali AA. Correlation of measles and dengue infection in Kassala, Eastern Sudan. *J Med Virol*. 2014. doi: 10.1002/jmv.24001. PMID: 24980486.
78. Elduma AH, Osman WM. Dengue and hepatitis E virus infection in pregnant women in Eastern Sudan, a challenge for diagnosis in an endemic area. *Pan Afr Med J*. 2014;19:391. doi: 10.11604/pamj.2014.19.391.5439. PMID: 25995787.
79. Soghaier MA, Mahmood SF, Pasha O, Azam SI, Karsani MM, Elmangory MM, et al. Factors associated with dengue fever IgG sero-prevalence in South Kordofan State, Sudan, in 2012: Reporting prevalence ratios. *Journal of Infection and Public Health*. 2014;7(1):54-61. doi: <http://dx.doi.org/10.1016/j.jiph.2013.07.008>. PMID: 2014063379.
80. Ari A. The prevalence and ecology of arboviruses in Turkey. *Turkiyede arboviruslarin faaliyeti ve ekolojisi uzerinde incelemeler. Turk hijiyen ve tecrubi biyoloji dergisi*. 1972;32(2):134-43. PMID: 4668350.
81. Radda A. Studies on the activity and ecology of arboviruses in Turkey. *Untersuchungen Uber Die Aktivitat Und Okologie Von Arboviren in Der Turkei. ZblBaktReihe A*. 1973;225(1):19-26. PMID: 0974127896.
82. Ergunay K, Saygan MB, Aydogan S, Litzba N, Niedrig M, Pinar A, et al. Investigation of dengue virus and yellow fever virus seropositivities in blood donors from central/Northern Anatolia, Turkey. *Mikrobiyoloji Bulteni*. 2010;44(3):415-24. PMID: 21063991.
83. Tezcan S, Kizildamar S, Ulger M, Aslan G, Tiftik N, Ozkul A, et al. Flavivirus seroepidemiology in blood donors in Mersin province, Turkey. *Mikrobiyoloji bulteni*. 2014;48(4):606-17. PMID: 25492656.
84. Bin Ghouth AS, Amarasinghe A, Letson GW. Dengue outbreak in Hadramout, Yemen, 2010: an epidemiological perspective. *Am J Trop Med Hyg*. 2012;86(6):1072-6. doi: 10.4269/ajtmh.2012.11-0723.
85. Malik MR, Mnzava A, Mohareb E, Zayed A, Al Kohlani A, Thabet AAK, et al. Chikungunya outbreak in Al-Hudaydah, Yemen, 2011: Epidemiological characterization and key lessons learned for early detection and control. *Journal of Epidemiology and Global Health*. 2014;4(3):203-11. doi: <http://dx.doi.org/10.1016/j.jegh.2014.01.004>. PMID: 2014527198.
86. Madani TA, Abuelzein ETME, Al-Bar HMS, Azhar EI, Kao M, Alshoeb HO, et al. Outbreak of viral hemorrhagic fever caused by dengue virus type 3 in Al-Mukalla, Yemen. *BMC Infectious Diseases*. 2013;13(1). doi: <http://dx.doi.org/10.1186/1471-2334-13-136>. PMID: 2013189579.
87. Rezza G, El-Sawaf G, Faggioni G, Vescio F, Al Ameri R, De Santis R, et al. Co-circulation of Dengue and Chikungunya Viruses, Al Hudaydah, Yemen, 2012. *Emerg Infect Dis*. 2014;20(8):1351-4. doi: 10.3201/eid2008.131615.
88. Qassem MAM, Jaawal AAT. Dengue fever or West Nile virus outbreak? Yemen 2013. *International Journal of Infectious Diseases*. 2014;Conference:16th International Congress on Infectious Diseases, ICID 2014 Cape Town South Africa. Conference Publication: 21 (pp 457). doi: <http://dx.doi.org/10.1016/j.ijid.2014.03.1364>. PMID: 71634698.
