# Supplementary material for: Dengue in the Middle East and North Africa: A Systematic Review
Source: PubMed Central journal article supplement (PMC5142774; doi:10.1371/journal.pntd.0005194), 2016-12-07
Supplement: pntd.0005194.s004.pdf [file pntd.0005194.s004.pdf]

**S2 Table. Summary of reported outbreaks and sentinel cases for dengue virus in the Middle East and North Africa.**

| Country, Year       | City or Governorate   | Description                                                               | Ref.             |
|---------------------|-----------------------|---------------------------------------------------------------------------|------------------|
| <b>Dengue virus</b> |                       |                                                                           |                  |
| <b>Djibouti</b>     |                       |                                                                           |                  |
| 1991-92             | Djibouti City         | 12,000 estimated cases; DEN-2                                             | [1, 2]           |
| 2010-11             | Djibouti City         | 4 cases in foreign military personnel; DEN-1,2,3                          | [3]              |
| <b>Egypt</b>        |                       |                                                                           |                  |
| 1799                | Cairo, Alexandria     | unconfirmed outbreak                                                      | [4]              |
| 1871                | Port Said             | unconfirmed outbreak                                                      | [4]              |
| 1880                | Cairo                 | unconfirmed outbreak                                                      | [4]              |
| 1889                | Nile Delta            | unconfirmed outbreak                                                      | [4]              |
| 1906                | Port Said, Suez Canal | unconfirmed outbreak                                                      | [5]              |
| 1927                | Countrywide           | unconfirmed outbreak                                                      | [5, 6]           |
| 1937                | n/a                   | n/a                                                                       | [4]              |
| 2010                | Port Ghalib           | 2 cases in travelers returning from Egypt                                 | [4]              |
| 2015                | Assiut                | 253 cases; DEN-1                                                          | [7]              |
| <b>Iraq</b>         |                       |                                                                           |                  |
| 1944                | n/s                   | unconfirmed outbreak based on clinical diagnosis                          | [8, 9]           |
| <b>Lebanon</b>      |                       |                                                                           |                  |
| 1945-46             | Beirut                | >100,000 suspected cases                                                  | [10]             |
| <b>Pakistan</b>     |                       |                                                                           |                  |
| 1994-1995           | Karachi               | first confirmed outbreak of DENV in Pakistan; 145 reported cases; DEN-1,2 | [11-16]          |
| 2003                | n/a                   | DEN-1,2                                                                   | [16, 17]         |
| 2005-06             | Karachi               | 3,640 cases; DEN-3                                                        | [13, 14, 16, 18] |
| 2006                | Multiple              | 1,931 confirmed cases; DEN-2,3                                            | [16, 19]         |
| 2007                | Multiple              | 1,226 confirmed cases; DEN-2,3                                            | [16, 19]         |
| 2008                | Multiple              | 2,469 confirmed cases; DEN-2,3,4                                          | [19, 20]         |
| 2009                | Lahore, multiple      | 1,085 confirmed cases; DEN-2,3,4                                          | [19]             |
| 2010                | Multiple              | 11,024 confirmed cases                                                    | [19] [21]        |
| 2011                | Punjab, multiple      | 21,580 confirmed cases; DEN-2                                             | [19, 22]         |
| 2013                | Khyber Pakhtunkhwa    | 9,024 reported cases                                                      | [23, 24]         |
|                     | Sindh                 | >6,000 reported cases                                                     | [23]             |
| 2014                | Lahore                | 1,799 reported cases                                                      | [25]             |
| <b>Saudi Arabia</b> |                       |                                                                           |                  |
| 1994                | Jeddah                | First detection of autochthonous transmission of DENV in Saudi Arabia;    | [15, 26]         |
|                     | Jeddah                | 469 cases; DEN-2                                                          | [15]             |
|                     |                       | 673 suspected cases, 289 confirmed; DEN-1,2                               | [16, 27]         |
| 1995                | n/a                   | 136 suspected cases, 6 confirmed; DEN-1,2                                 | [15, 27]         |
| 1996                | n/a                   | 57 suspected cases, 2 confirmed                                           | [15]             |
| 1997                | n/a                   | 62 suspected cases, 15 confirmed; DEN-3                                   | [15, 27]         |
| 1998                | n/a                   | 31 suspected cases, 0 confirmed                                           | [15]             |
| 1999                | n/a                   | 26 suspected cases, 3 confirmed                                           | [15]             |
| 2000                | n/a                   | 17 suspected cases, 0 confirmed                                           | [15]             |
| 2001                |                       | 7 suspected cases, 0 confirmed                                            | [15]             |
| 2004                | Jeddah, Makkah        | DEN-3                                                                     | [16]             |
| 2005                | n/a                   | 32 confirmed cases; DEN-3                                                 | [15, 16]         |
| 2006                | n/a                   | DEN-1                                                                     |                  |
| 2006                | Jeddah and Makkah     | >1,269 cases; DEN-1                                                       | [15, 16, 28]     |
| 2007                | Jeddah and Makkah     | 200 estimated cases; DEN-3                                                | [16, 28]         |

|                |                                                     |                                         |                  |
|----------------|-----------------------------------------------------|-----------------------------------------|------------------|
| 2008           | Jeddah and Makkah                                   | 775 estimated cases; DEN-3              | [15, 16, 28]     |
| 2009           | Jeddah and Makkah                                   | 1,500 estimated cases                   | [28]             |
| 2010           | Jeddah and Makkah                                   | 2,200 estimated cases                   | [28]             |
| 2011           | Jeddah and Makkah                                   | 2,376 estimated cases                   | [28]             |
| 2012           | Jeddah and Makkah                                   | 800 estimated cases                     | [28]             |
| 2013           | Jeddah and Makkah                                   | 4,411 estimated cases                   | [28]             |
| 2006-08        | Jeddah                                              | n/a                                     | [29]             |
| 2015           | Mecca                                               | 13 suspected cases                      | [30]             |
| <b>Somalia</b> |                                                     |                                         |                  |
| 1941           | Mogadishu                                           | 72 reported cases                       | [31]             |
| 1982-1983      | Mogadishu                                           | DEN-2                                   | [16, 32, 33]     |
| 1985-87        | Hargeysa                                            | DEN-2                                   | [33, 34]         |
| 1992-1993      | Mogadishu                                           | 41 reported cases; DEN-1,2,3            | [16, 35, 36]     |
| 2005           | n/s                                                 | n/s                                     | [37]             |
| 2011           | Mogadishu                                           | DEN-1,2,3                               | [38, 39]         |
| <b>Sudan</b>   |                                                     |                                         |                  |
| 1984-86        | Port Sudan                                          | 18 reported cases; DEN-1,2,3            | [32, 40-42]      |
| 1989           | Northern Province                                   | DEN-2                                   | [43]             |
| 2003           | Port Sudan                                          | 366 reported cases                      | [41, 43]         |
| 2004           | Multiple                                            | 127 reported cases; DEN-1,2             | [16, 41]         |
| 2005           | Multiple                                            | 233 reported cases; DEN-1,2             | [16, 41]         |
| 2006           | Multiple                                            | 7 reported cases; DEN-1,2               | [16, 41]         |
| 2008           | Multiple, Port Sudan                                | 449 reported cases; DEN-1,2             | [16, 41, 44, 45] |
| 2009           | Multiple, Port Sudan                                | 447 reported cases                      | [41, 45]         |
| 2010           | Port Sudan, multiple                                | 4,008 reported cases; DEN-2             | [41]             |
| 2011           | Multiple                                            | 257 reported cases                      | [41]             |
| 2012           | Multiple                                            | 59 reported cases                       | [41]             |
| 2014           | Red Sea State                                       | 738 reported cases                      | [41]             |
| 2015           | Darfur, Kassala, Kordofan                           | 557 suspected cases                     | [46]             |
| <b>Yemen</b>   |                                                     |                                         |                  |
| 1983           | Dalah                                               | 1 case in traveler returning from Yemen | [47]             |
| 1994           | Shabwah, Al Hudaydah, Mukkala                       | DEN-3                                   | [16, 48]         |
| 2000           | Al Hudaydah                                         | 653 suspected cases; DEN-2              | [2, 16, 48]      |
| 2001-2003      | Shabwah                                             | DEN-2                                   | [2, 48]          |
| 2004           | Al Hudaydah, Shabwah                                | 45 suspected cases; DEN-2               | [2, 48]          |
| 2005-2006      | Shabwah, Hadramout, Al Hudaydah                     | 403 suspected cases; DEN-2,3            | [2, 48, 49]      |
| 2008           | Shabwah, Abyan, Taiz, Mukalla                       | 1,001 reported cases; DEN-3             | [2, 16, 49]      |
| 2009           | n/s                                                 | 900 cases                               | [49]             |
| 2010           | Multiple, Hadramout                                 | 5,534 suspected cases; DEN-2,3          | [49, 50]         |
| 2015           | Shabwah, Hadramout, Abyan, Maifaa, Eitg, Taiz, Lahj | >20,000 estimated cases                 | [51-54]          |

## References

1. Rodier GR, Gubler DJ, Cope SE, Cropp CB, Soliman AK, Polycarpe D, et al. Epidemic dengue 2 in the city of Djibouti 1991-1992. *Transactions of the Royal Society of Tropical Medicine and Hygiene*. 1996;90(3):237-40. doi: <http://dx.doi.org/10.1016/S0035-9203%2896%2990228-X>. PMID: 1996194667.
2. World Health Organization Regional Office for the Eastern Mediterranean. Dengue outbreak in Yemen. *Weekly Epidemiological Monitor*. 2008;1(24). Available [www.emro.who.int/surveillance-forecasting-response/weekly-epidemiological-monitor/](http://www.emro.who.int/surveillance-forecasting-response/weekly-epidemiological-monitor/). Accessed 17 Jan 2016.
3. De Laval F, Dia A, Plumet S, Decam C, Leparc Goffart I, Deparis X. Dengue surveillance in the French armed forces: A dengue sentinel surveillance system in countries without efficient local epidemiological surveillance.

- Journal of Travel Medicine. 2013;20(4):259-61. doi: <http://dx.doi.org/10.1111/j.1708-8305.2012.00674.x>. PMID: 2013420761.
4. World Health Organization Regional Office for the Eastern Mediterranean. Travel-associated dengue fever in Egypt. *Weekly Epidemiological Monitor*. 2010;3(24). Available [www.emro.who.int/surveillance-forecasting-response/weekly-epidemiological-monitor/](http://www.emro.who.int/surveillance-forecasting-response/weekly-epidemiological-monitor/). Accessed 17 Jan 2016.
  5. Kamal H. The 1927 Epidemic of Dengue in Egypt. *Br Med J*. 1928;1(3521):1104-6. PMID: 20773982.
  6. O'Meara FJ. Dengue (Eastern Mediterranean). *Trans R Soc Trop Med Hyg*. 1956;50(2):181. PMID: 13324927.
  7. World Health Organization. Dengue Fever - Egypt 2015. Available from: <http://www.who.int/csr/don/12-november-2015-dengue/en/>. Accessed 12 Dec 2015.
  8. Fleming RF, French JM. Dengue in Iraq. *Trans R Soc Trop Med Hyg*. 1947;40(6):851-60.
  9. Feghali A. Dengue, tertian fever and harara in Lebanon; differential diagnosis; abnormal forms and prevention. *La Presse medicale*. 1951;59(71):1481. PMID: 14891724.
  10. Russell PK, Buescher EL, McCown JM, Ordonez J. Recovery of dengue viruses from patients during epidemics in Puerto Rico and East Pakistan. *Am J Trop Med Hyg*. 1966;15(4):573-9.
  11. World Health Organization Regional Office for the Eastern Mediterranean. Dengue fever in Pakistan: Inten-sity declines, threat remains. 2012;5(1). Available [www.emro.who.int/surveillance-forecasting-response/weekly-epidemiological-monitor/](http://www.emro.who.int/surveillance-forecasting-response/weekly-epidemiological-monitor/). Accessed 17 Jan 2016.
  12. Chan YC, Salahuddin NI, Khan J, Tan HC, Seah CLK, Li J, et al. Dengue haemorrhagic fever outbreak in Karachi, Pakistan, 1994. *Transactions of the Royal Society of Tropical Medicine and Hygiene*. 1995;89(6):619-20. doi: <http://dx.doi.org/10.1016/0035-9203%2895%2990412-3>. PMID: 1996022132.
  13. Raza FA, Rehman SU, Khalid R, Ahmad J, Ashraf S, Iqbal M, et al. Demographic and clinico-epidemiological features of dengue fever in Faisalabad, Pakistan. *PLoS ONE*. 2014;9(3). doi: <http://dx.doi.org/10.1371/journal.pone.0089868>. PMID: 2014220022.
  14. Chan YC, Salahuddin NI, Khan J, Tan HC, Seah CL, Li J, et al. Dengue haemorrhagic fever outbreak in Karachi, Pakistan, 1994. *Trans R Soc Trop Med Hyg*. 1995;89(6):619-20.
  15. World Health Organization. Dengue: Guidelines for Diagnosis, Treatment, Prevention and Control. Geneva, Switzerland. 2009. Available at: <http://www.who.int/tdr/publications/documents/dengue-diagnosis.pdf> Accessed 1 September 2016.
  16. World Health Organization Regional Office for the Eastern Mediterranean. Multiple outbreaks from DF/DHF in the EMR. 2008;1(30). Available [www.emro.who.int/surveillance-forecasting-response/weekly-epidemiological-monitor/](http://www.emro.who.int/surveillance-forecasting-response/weekly-epidemiological-monitor/). Accessed 17 Jan 2016.
  17. Tang JW, Khanani MR, Zubairi AM, Lam WY, Lai F, Hashmi K, et al. A wide spectrum of dengue IgM and PCR positivity post-onset of illness found in a large dengue 3 outbreak in Pakistan. *Journal of Medical Virology*. 2008;80(12):2113-21. doi: <http://dx.doi.org/10.1002/jmv.21290>. PMID: 2008582978.
  18. Ahmed S, Ali N, Ashraf S, Ilyas M, Tariq WUZ, Chotani RA. Dengue fever outbreak: A clinical management experience. *Journal of the College of Physicians and Surgeons Pakistan*. 2008;18(1):8-12. PMID: 2008142482.
  19. World Health Organization Regional Office for the Eastern Mediterranean. Dengue in Pakistan 2013;6(52). Available [www.emro.who.int/surveillance-forecasting-response/weekly-epidemiological-monitor/](http://www.emro.who.int/surveillance-forecasting-response/weekly-epidemiological-monitor/). Accessed 17 Jan 2016.
  20. Haider Z, Ahmad FZ, Mahmood A, Waseem T, Shafiq I, Raza T, et al. Dengue fever in Pakistan: A paradigm shift; Changing epidemiology and clinical patterns. *Perspectives in Public Health*. 2015;135(6):294-8. doi: <http://dx.doi.org/10.1177/1757913915599019>. PMID: 2015501013.
  21. Murad H, Asahar RJ, Zaheen M, Shawali R. Outbreak investigation of Dengue fever in Sundia, Chakaiser, Shangla, Pakistan-2008. *J Ayub Med Coll Abbottabad*. 2014;26(4):571-6. PMID: 25672190.
  22. Ahmed S, Mohammad WW, Hamid F, Akhter A, Afzal RK, Mahmood A. The 2011 dengue haemorrhagic fever outbreak in lahore - an account of clinical parameters and pattern of haemorrhagic complications. *Journal of the College of Physicians and Surgeons Pakistan*. 2013;23(7):463-7. PMID: 2013472360.
  23. Wasim A, Kazi AN, Hussain SA. 2013: Rise of the deadly dengue fever in Pakistan. *J Infect Public Health*. 2014;7(5):453-4. doi: 10.1016/j.jiph.2014.05.001. PMID: 24986026.
  24. Ali Shah I, Asghar R, Baig M, Ja A. Risk factors identification of Dengue fever outbreak in Mansehra-Sept 2013, Shah IA, Baig MA, Ansari JA, Asghar RJ. *Annals of Global Health*. 2015;81(1):9. PMID: 72073480.
  25. Kraemer MUG, Perkins TA, Cummings DAT, Zakar R, Hay SI, Smith DL, et al. Big city, small world: Density, contact rates, and transmission of dengue across Pakistan. *Journal of the Royal Society Interface*. 2015;12(111). doi: <http://dx.doi.org/10.1098/rsif.2015.0468>. PMID: 2015488447.

26. Fakeeh M, Zaki AM. Dengue in Jeddah, Saudi Arabia, 1994-2002. *Dengue Bulletin*. 2003;27:13-8. PMID: 2004280253.
27. Azhar EI, Hashem AM, El-Kafrawy SA, Abol-Ela S, Abd-Alla AMM, Sohrab SS, et al. Complete genome sequencing and phylogenetic analysis of dengue type 1 virus isolated from Jeddah, Saudi Arabia. *Virology Journal*. 2015;12(1). doi: <http://dx.doi.org/10.1186/s12985-014-0235-7>. PMID: 2015179071.
28. Aziz AT, Al-Shami SA, Mahyoub JA, Hatabbi M, Ahmad AH, Rawi CSM. An update on the incidence of dengue gaining strength in Saudi Arabia and current control approaches for its vector mosquito. *Parasites and Vectors*. 2014;7(1). doi: <http://dx.doi.org/10.1186/1756-3305-7-258>. PMID: 2014410848.
29. Alzahrani AG, Al Mazroa MA, Alrabeah AM, Ibrahim AM, Mokdad AH, Memish ZA. Geographical distribution and spatio-temporal patterns of dengue cases in Jeddah governorate from 2006-2008. *Transactions of the Royal Society of Tropical Medicine and Hygiene*. 2013;107(1):23-9. doi: <http://dx.doi.org/10.1093/trstmh/trs011>. PMID: 2013536559.
30. ProMED-mail. Dengue - Saudi Arabia (MECCA) MOH Alert. ProMED-mail 2015; 9 Dec: 20151209.3846844. <<http://www.promedmail.org>>. Accessed 17 Jan 2016.
31. McCarthy DD, Bagster Wilson D. Dengue in the East African command. Incidence in relation to Aedes prevalence and some clinical features. *Transactions of the Royal Society of Tropical Medicine and Hygiene*. 1948;42(1):83-8. doi: [http://dx.doi.org/10.1016/0035-9203\(48\)90352-6](http://dx.doi.org/10.1016/0035-9203(48)90352-6). PMID: 0007199567.
32. Saleh AS, Hassan A, Scott RM, Mellick PW, Oldfield EC, 3rd, Podgore JK. Dengue in north-east Africa. *Lancet*. 1985;2(8448):211-2. PMID: 2862392.
33. Botros BAM, Watts DM, Soliman AK, Salib AW, Moussa MI, Mursal H, et al. Serological evidence of dengue fever among refugees, Hargeysa, Somalia. *Journal of Medical Virology*. 1989;29(2):79-81. PMID: 1989282288.
34. Rodier GR, Parra JP, Kamil M, Chakib SO, Cope SE. Recurrence and emergence of infectious diseases in Djibouti city. *Bulletin of the World Health Organization*. 1995;73(6):755-9. PMID: 1996056853.
35. Sharp TW, Wallace MR, Hayes CG, Sanchez JL, DeFraitess RF, Arthur RR, et al. Dengue fever in U.S. troops during Operation Restore Hope, Somalia, 1992- 1993. *American Journal of Tropical Medicine and Hygiene*. 1995;53(1):89-94. PMID: 1995228394.
36. Kanesa-thasan N, Chang GJJ, Smoak BL, Magill A, Burrous MJ, Hoke Jr CH. Molecular and epidemiologic analysis of dengue virus isolates from Somalia. *Emerging Infectious Diseases*. 1998;4(2):299-303. PMID: 1998227052.
37. Ellis BR, Barrett ADT. The enigma of yellow fever in East Africa. *Reviews in Medical Virology*. 2008;18(5):331-46. doi: <http://dx.doi.org/10.1002/rmv.584>. PMID: 2008451571.
38. Ochieng CA. Co-circulation of multiple serotypes of dengue virus in somalia, 2011. *American Journal of Tropical Medicine and Hygiene*. 2012;(1):30. PMID: 71040730.
39. Kyobe Bosa H, Montgomery JM, Kimuli I, Lutwama JJ. Dengue fever outbreak in Mogadishu, Somalia 2011: Co-circulation of three dengue virus serotypes. *International Journal of Infectious Diseases*. 2014;(21):3. doi: <http://dx.doi.org/10.1016/j.ijid.2014.03.412>. PMID: 71633760.
40. World Health Organization Regional Office for the Eastern Mediterranean. Dengue fever in Sudan: cases continue to rise. 2010;3(11). Available [www.emro.who.int/surveillance-forecasting-response/weekly-epidemiological-monitor/](http://www.emro.who.int/surveillance-forecasting-response/weekly-epidemiological-monitor/). Accessed 17 Jan 2016.
41. World Health Organization Regional Office for the Eastern Mediterranean. Dengue fever in Sudan: cases continue to rise. 2014;7(25). Available [www.emro.who.int/surveillance-forecasting-response/weekly-epidemiological-monitor/](http://www.emro.who.int/surveillance-forecasting-response/weekly-epidemiological-monitor/). Accessed 17 Jan 2016.
42. Sharp TW, Wallace MR, Hayes CG, Sanchez JL, DeFraitess RF, Arthur RR, et al. Dengue fever in U.S. troops during Operation Restore Hope, Somalia, 1992-1993. *Am J Trop Med Hyg*. 1995;53(1):89-94.
43. Malik A, Earhart K, Mohareb E, Saad M, Saeed M, Ageep A, et al. Dengue hemorrhagic fever outbreak in children in Port Sudan. *Journal of Infection and Public Health*. 2011;4(1):1-6. doi: <http://dx.doi.org/10.1016/j.jiph.2010.08.001>. PMID: 2011100176.
44. Seidahmed OME, Siam HAM, Soghaier MA, Abubakr M, Osman HA, Abd Elrhman LS, et al. Dengue vector control and surveillance during a major outbreak in a coastal Red Sea area in Sudan. *Eastern Mediterranean Health Journal*. 2012;18(12):1217-24. PMID: 2013300757.
45. Adam I, Jumaa AM, Elbashir HM, Karsany MS. Maternal and perinatal outcomes of dengue in Port Sudan, Eastern Sudan. *Virology Journal*. 2010;7(153). doi: <http://dx.doi.org/10.1186/1743-422X-7-153>. PMID: 2010416905.
46. ProMED-mail. Dengue - Sudan (02): New Areas, fatal, MOH. ProMED-mail. 2015; 12 Dec: 20151212.3854435. <<http://www.promedmail.org>>. Accessed 17 Jan 2016.

47. Jimenez-Lucho VE, Fisher EJ, Saravolatz LD. Dengue with hemorrhagic manifestations: An imported case from the Middle East. *American Journal of Tropical Medicine and Hygiene*. 1984;33(4):650-3. PMID: 1984178309.
48. Ghouth ASB, Amarasinghe A, Letson GW. Dengue outbreak in Hadramout, Yemen, 2010: An epidemiological perspective. *American Journal of Tropical Medicine and Hygiene*. 1072;86(6):1072-6. doi: <http://dx.doi.org/10.4269/ajtmh.2012.11-0723>. PMID: 2012334646.
49. World Health Organization Regional Office for the Eastern Mediterranean. Dengue fever in Yemen. 2010;3(23). Available [www.emro.who.int/surveillance-forecasting-response/weekly-epidemiological-monitor/](http://www.emro.who.int/surveillance-forecasting-response/weekly-epidemiological-monitor/). Accessed 17 Jan 2016.
50. Madani TA, Abuelzein ETME, Al-Bar HMS, Azhar EI, Kao M, Alshoeb HO, et al. Outbreak of viral hemorrhagic fever caused by dengue virus type 3 in Al-Mukalla, Yemen. *BMC Infectious Diseases*. 2013;13(1). doi: <http://dx.doi.org/10.1186/1471-2334-13-136>. PMID: 2013189579.
51. ProMED-mail. Dengue Fever - Yemen (10): (Shabwah). ProMED-mail. 2015; 31 Dec: 20151231.3903031. <<http://www.promedmail.org>>. Accessed 17 Jan 2016.
52. ProMED-mail. Dengue Fever - Yemen (05): (Shabwah) Fatal, MOH.: ProMED-mail. 5 Sept: 20150905.3625697. <<http://www.promedmail.org>>. Accessed 17 Jan 2016.
53. ProMED-mail. Dengue Fever - Yemen (04): (Taiz) WHO update. ProMED-mail. 29 Aug: 20150829.3608441. <<http://www.promedmail.org>>. Accessed 17 Jan 2016.
54. ProMED-mail. Dengue Fever - Yemen (03): Fatal, Request for Information. ProMED-mail. 18 June: 20150618.3445620. <<http://www.promedmail.org>>. Accessed 17 Jan 2016
