# Supplementary material for: Dengue in the Middle East and North Africa: A Systematic Review
Source: PubMed Central journal article supplement (PMC5142774; doi:10.1371/journal.pntd.0005194), 2016-12-07
Supplement: pntd.0005194.s005.pdf [file pntd.0005194.s005.pdf]

**S3 Table. Reported *Aedes aegypti* and *Aedes albopictus* occurrence in the Middle East and North Africa.**

| Country      | <i>Aedes aegypti</i> | <i>Aedes albopictus</i> | Reference   |
|--------------|----------------------|-------------------------|-------------|
| Afghanistan  | +                    | -                       | [1]         |
| Algeria      | <i>historic only</i> | +                       | [2, 3]      |
| Bahrain      | -                    | -                       | -           |
| Djibouti     | +                    | -                       | [4]         |
| Egypt        | +                    | -                       | [5]         |
| Iran         | -                    | -                       | -           |
| Iraq         | -                    | -                       | -           |
| Jordan       | -                    | -                       | -           |
| Kuwait       | -                    | -                       | -           |
| Lebanon      | +                    | +                       | [6-8]       |
| Libya        | <i>historic only</i> | -                       | [3]         |
| Morocco      | <i>historic only</i> | -                       | [3]         |
| Oman         | +                    | -                       | [9]         |
| Pakistan     | +                    | +                       | [10]        |
| Palestine    | -                    | +                       | [11]        |
| Qatar        | -                    | -                       | -           |
| Saudi Arabia | +                    | +                       | [12-15]     |
| Somalia      | +                    | -                       | [16, 17]    |
| Sudan        | +                    | -                       | [18]        |
| Syria        | <i>historic only</i> | +                       | [3, 7]      |
| Tunisia      | <i>historic only</i> | -                       | [3]         |
| Turkey       | +                    | +                       | [1, 19, 20] |
| U.A.E.       | -                    | -                       | -           |
| Yemen        | +                    | -                       | [21]        |

*Historic only* refers to reported occurrence of that species prior to 1960; all other reports were published on or after 1995.

U.A.E., United Arab Emirates

## References

1. Kraemer MU, Sinka ME, Duda KA, Mylne AQ, Shearer FM, Barker CM, et al. The global distribution of the arbovirus vectors *Aedes aegypti* and *Ae. albopictus*. *Elife*. 2015;4:e08347. doi: 10.7554/eLife.08347. PMID: 26126267.
2. Izri A, Bitam I, Charrel RN. First entomological documentation of *Aedes (Stegomyia) albopictus* (Skuse, 1894) in Algeria. *Clinical Microbiology and Infection*. 2011;17(7):1116-8. doi: <http://dx.doi.org/10.1111/j.1469-0691.2010.03443.x>. PMID: 2011372571.
3. Holstein M. Dynamics of *Aedes aegypti* distribution, density and seasonal prevalence in the Mediterranean area. *Bull World Health Organ*. 1967;36(4):541-3. PMID: 5299448.
4. Rodier GR, Gubler DJ, Cope SE, Cropp CB, Soliman AK, Polycarpe D, et al. Epidemic dengue 2 in the city of Djibouti 1991-1992. *Transactions of the Royal Society of Tropical Medicine and Hygiene*. 1996;90(3):237-40. doi: <http://dx.doi.org/10.1016/S0035-9203%2896%2990228-X>. PMID: 1996194667.
5. Heikal OM, El-Bahnasawy MM, Morsy AT, Khalil HH. *Aedes aegypti* re-emerging in Egypt: a review and what should be done? *Journal of the Egyptian Society of Parasitology*. 2011;41(3):801-14. PMID: 22435171.
6. Knio KM, Markarian N, Kassis A, Nuwayri-Salti N. A two-year survey on mosquitoes of Lebanon. *Parasite*. 2005;12(3):229-35. PMID: 16218210.
7. Haddad N, Harbach RE, Chamat S, Bouharoun-Tayoun H. Presence of *Aedes albopictus* in Lebanon and Syria. *J Am Mosq Control Assoc*. 2007;23(2):226-8. doi: 10.2987/8756-971X(2007)23[226:POAAIL]2.0.CO;2. PMID: 17847859.
8. Haddad N, Mousson L, Vazeille M, Chamat S, Tayeh J, Osta MA, et al. *Aedes albopictus* in Lebanon, a potential risk of arboviruses outbreak. *BMC Infectious Diseases*. 2012;12(300). doi: <http://dx.doi.org/10.1186/1471-2334-12-300>. PMID: 2012729031.

9. Dengue fever. Communicable Diseases Surveillance Newsletter. September 21, 2014.
10. Jahan N. Detection of dengue viruses in aedes mosquitoes from different localities of Lahore, Pakistan. *American Journal of Tropical Medicine and Hygiene*. 2013;89 (5 SUPPL. 1) (pp 35). PMID: 71311948.
11. Adawi SHAA. Presence of *Aedes albopictus* in Palestine –West Bank. *International Journal of Tropical Disease and Health*. 2012;2(4):301-10.
12. Health Section of the Secretariat of the League of Nations. Dengue and dengue haemorrhagic fever. *Weekly epidemiological record*. 1995;70(33):237-8. PMID: 7669530.
13. Alikhan M, Al Ghamdi K, Mahyoub JA. *Aedes* mosquito species in western Saudi Arabia. *J Insect Sci*. 2014;14:69. doi: 10.1093/jis/14.1.69. PubMed PMID: 25373216.
14. Al-Azab AM, Al-Ghamdi KM, Al-Hudaib K, Zaituon AA, Shaheen MA, El-Araby W. Morphological and molecular identification of dengue fever vector *Aedes aegypti* (diptera: Culicidae) in Jeddah Governorate-Saudi Arabia. *Journal of Pure and Applied Microbiology*. 2013;7(2):1391-400. PMID: 2013521457.
15. Aziz AT, Dieng H, Ahmad AH, Mahyoub JA, Turkistani AM, Mesed H, et al. Household survey of container-breeding mosquitoes and climatic factors influencing the prevalence of *Aedes aegypti* (Diptera: Culicidae) in Makkah City, Saudi Arabia. *Asian Pacific Journal of Tropical Biomedicine*. 2012;2(11):849-57. doi: <http://dx.doi.org/10.1016/S2221-1691%2812%2960242-1>. PMID: 2012480605.
16. Sharp TW, Wallace MR, Hayes CG, Sanchez JL, DeFraités RF, Arthur RR, et al. Dengue fever in U.S. troops during Operation Restore Hope, Somalia, 1992- 1993. *American Journal of Tropical Medicine and Hygiene*. 1995;53(1):89-94. PMID: 1995228394.
17. Kyobe Bosa H, Montgomery JM, Kimuli I, Lutwama JJ. Dengue fever outbreak in Mogadishu, Somalia 2011: Co-circulation of three dengue virus serotypes. *International Journal of Infectious Diseases*. 2014;21:3. doi: <http://dx.doi.org/10.1016/j.ijid.2014.03.412>. PMID: 71633760.
18. Seidahmed OME, Hassan SA, Soghaier MA, Siam HAM, Ahmed FTA, Elkarsany MM, et al. Spatial and Temporal Patterns of Dengue Transmission along a Red Sea Coastline: A Longitudinal Entomological and Serological Survey in Port Sudan City. *PLoS Neglected Tropical Diseases*. 2012;6(9). doi: <http://dx.doi.org/10.1371/journal.pntd.0001821>. PMID: 2012579248.
19. Oter K, Gunay F, Tuzer E, Linton YM, Bellini R, Alten B. First record of *Stegomyia albopicta* in Turkey determined by active ovitrap surveillance and DNA barcoding. *Vector Borne Zoonotic Dis*. 2013;13(10):753-61. doi: 10.1089/vbz.2012.1093. PMID: 23808976.
20. Akiner MM, Demirci B, Babuadze G, Robert V, Schaffner F. Correction: Spread of the Invasive Mosquitoes *Aedes aegypti* and *Aedes albopictus* in the Black Sea Region Increases Risk of Chikungunya, Dengue, and Zika Outbreaks in Europe. *PLoS neglected tropical diseases*. 2016;10(5):e0004764. doi: 10.1371/journal.pntd.0004764. PMID: 27232603.
21. Fahmy NT, Kléna JD, Mohamed AS, Zayed A, Villinski JT. Complete Genome Sequence of Chikungunya Virus Isolated from an *Aedes aegypti* Mosquito during an Outbreak in Yemen, 2011. *Genome announcements*. 2015;3(4). doi: 10.1128/genomeA.00789-15. PMID: 26184944.
